# Supplementary material
Source: publisher figshare collection journal article supplement (https://karger.figshare.com/articles/dataset/_/6120314)
Supplement: Supplementary file 1 [file 1]

**Suppl. Table 3**. Data of complete 5S rDNA and partial *U2 snRNA* and histones sequences of *Bergiaria westermanni*.

| **Partial sequence (*B. westermanni*)** | **Length (base pair)** | **GenBank accession number** | **Sequence similarity** |
| --- | --- | --- | --- |
| 5S rDNA | 179 | MG450337 MG450338 MG450339 MG450340 MG450341 MG450342 MG450343 MG450344 | 95% - *Amphichthys cryptocentrus* isolate A2.I.2 5S ribosomal RNA gene, complete sequence; and non-transcribed spacer genomic sequence  (GenBank acession no. [GU645598.1](https://www.ncbi.nlm.nih.gov/nucleotide/291501447?report=genbank&log$=nuclalign&blast_rank=13&RID=04EYAHFE015)) |
| U2 *snRNA* | 426 | MG450336 | 83% - *Plectorhinchus mediterraneus* clone 7 U2 snRNA gene, partial sequence; intergenic spacer 1 and U5 snRNA gene, complete sequence; and intergenic spacer 2, partial sequence (GenBank acession no. [JN850658.1](https://www.ncbi.nlm.nih.gov/nucleotide/375161292?report=genbank&log$=nuclalign&blast_rank=10&RID=04D9Y63601N)) |
| Histone H1 | 121 | MG450334 | 93% - *Astyanax paranae* voucher LBP13340 histone H1 gene, partial cds(GenBank acession no. [KJ129662.1](https://www.ncbi.nlm.nih.gov/nucleotide/607235952?report=genbank&log$=nuclalign&blast_rank=1&RID=04DXHA48015)) |
| Histone H3 | 174 | MG450335 | 91% - PREDICTED: *Ictalurus punctatus* histone H3-like (LOC108261894), partial mRNA  (GenBank accession no. [XM_017462646.1](https://www.ncbi.nlm.nih.gov/nucleotide/1042239123?report=genbank&log$=nuclalign&blast_rank=1&RID=ZBRAPSCA015)) |
